# Supplementary material for: Water Availability Controls the Biomass Increment of Melia dubia in South India
Source: MDPI journal article supplement (doi:10.3390/f12121675), 2021-11-30
Supplement: s1 [file s1]

## Supplementary Materials:

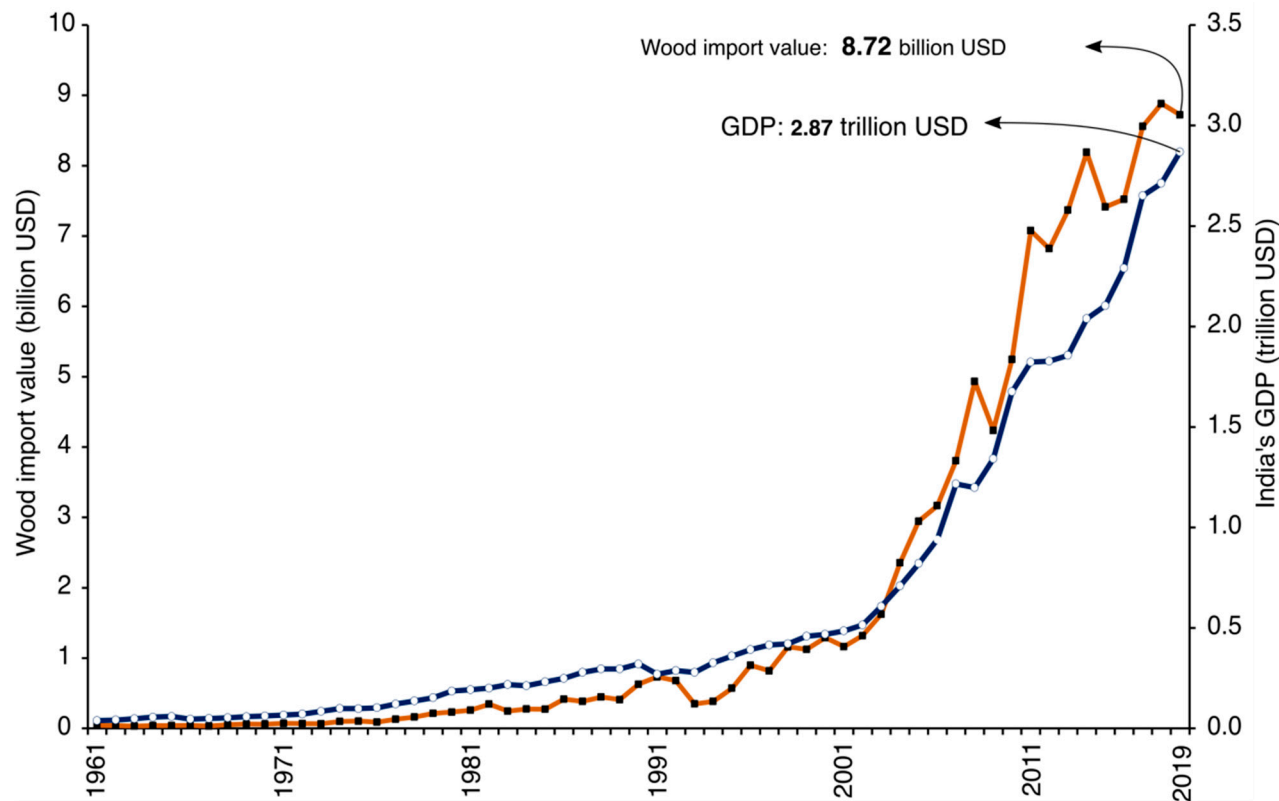

**Figure S1.** India's annual import value of forest products (blank circles with blue line) and gross domestic product (GDP) growth (black squares with orange line), from 1961 to 2019 [12,13].

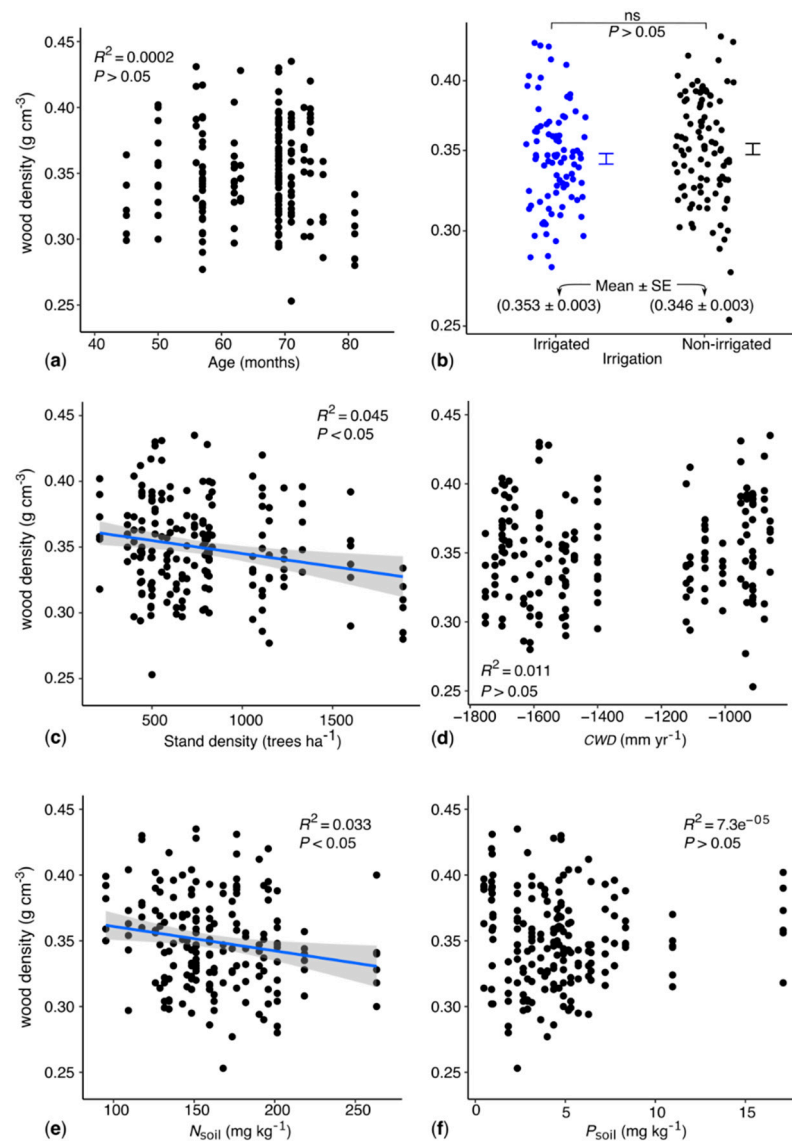

**Figure S2.** The influence of the key variables stand age (a), irrigation (b), stand density (c), climatological water deficit (CWD) (d), soil nitrogen ( $N_{\text{soil}}$ ) (e) and soil phosphorus ( $P_{\text{soil}}$ ) content (f) on wood density. Wood density was measured from cores extracted at breast height on 186 trees across a subset of 31 woodlots. Linear regression models were fitted and regression lines (blue) and standard error corridors (gray) are depicted for  $P < 0.05$ . The categorical variable irrigation was tested for significant differences ( $P < 0.05$ ) among groups with the Wilcoxon rank sum test (with continuity correction).

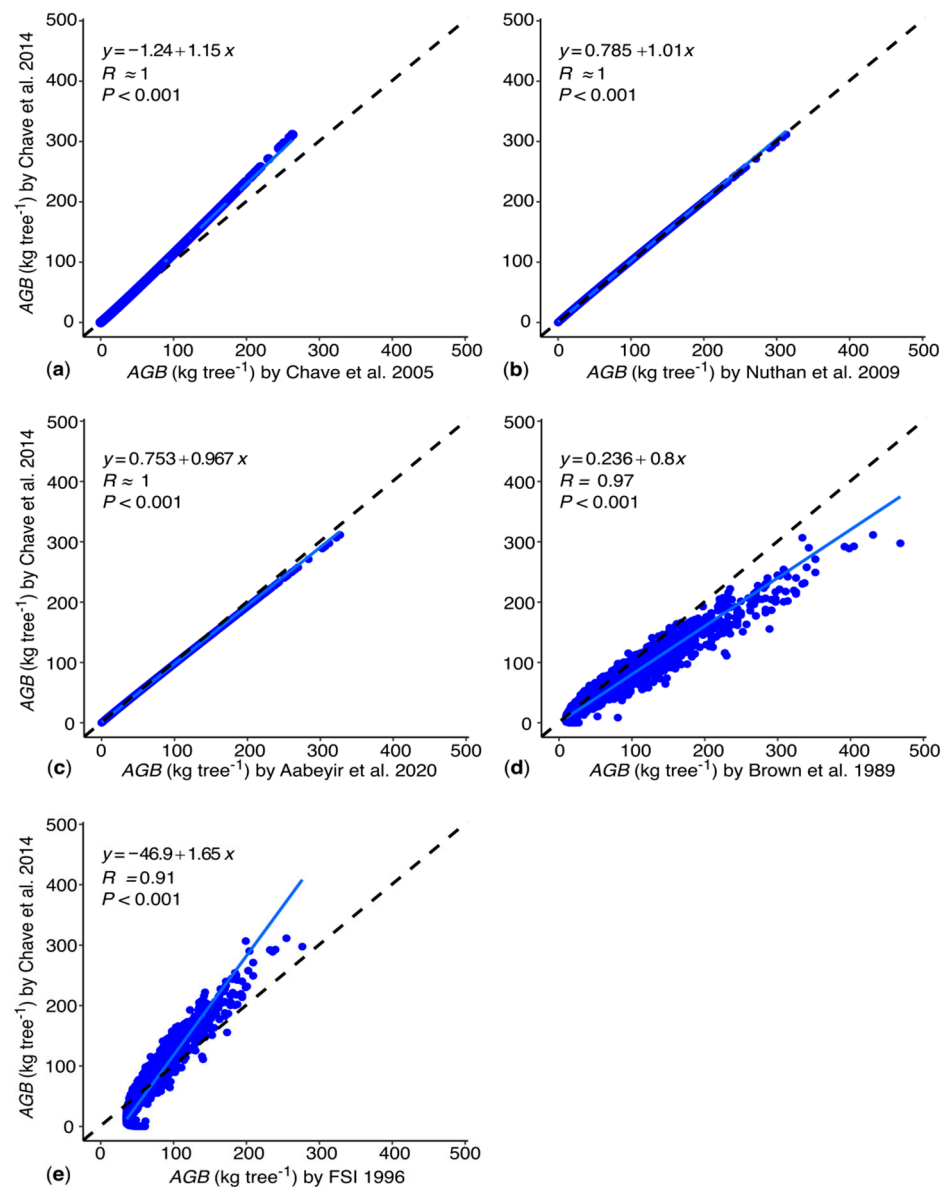

**Figure S3.** Comparison of tree-level aboveground biomass (AGB) estimates derived from the pantropical model applied in our study (Chave et al., 2014; [39]) to other AGB models. Data from all 6,898 studied trees are depicted (dots). The solid blue lines are the respective regression lines, the dashed black lines represent 1:1 lines.

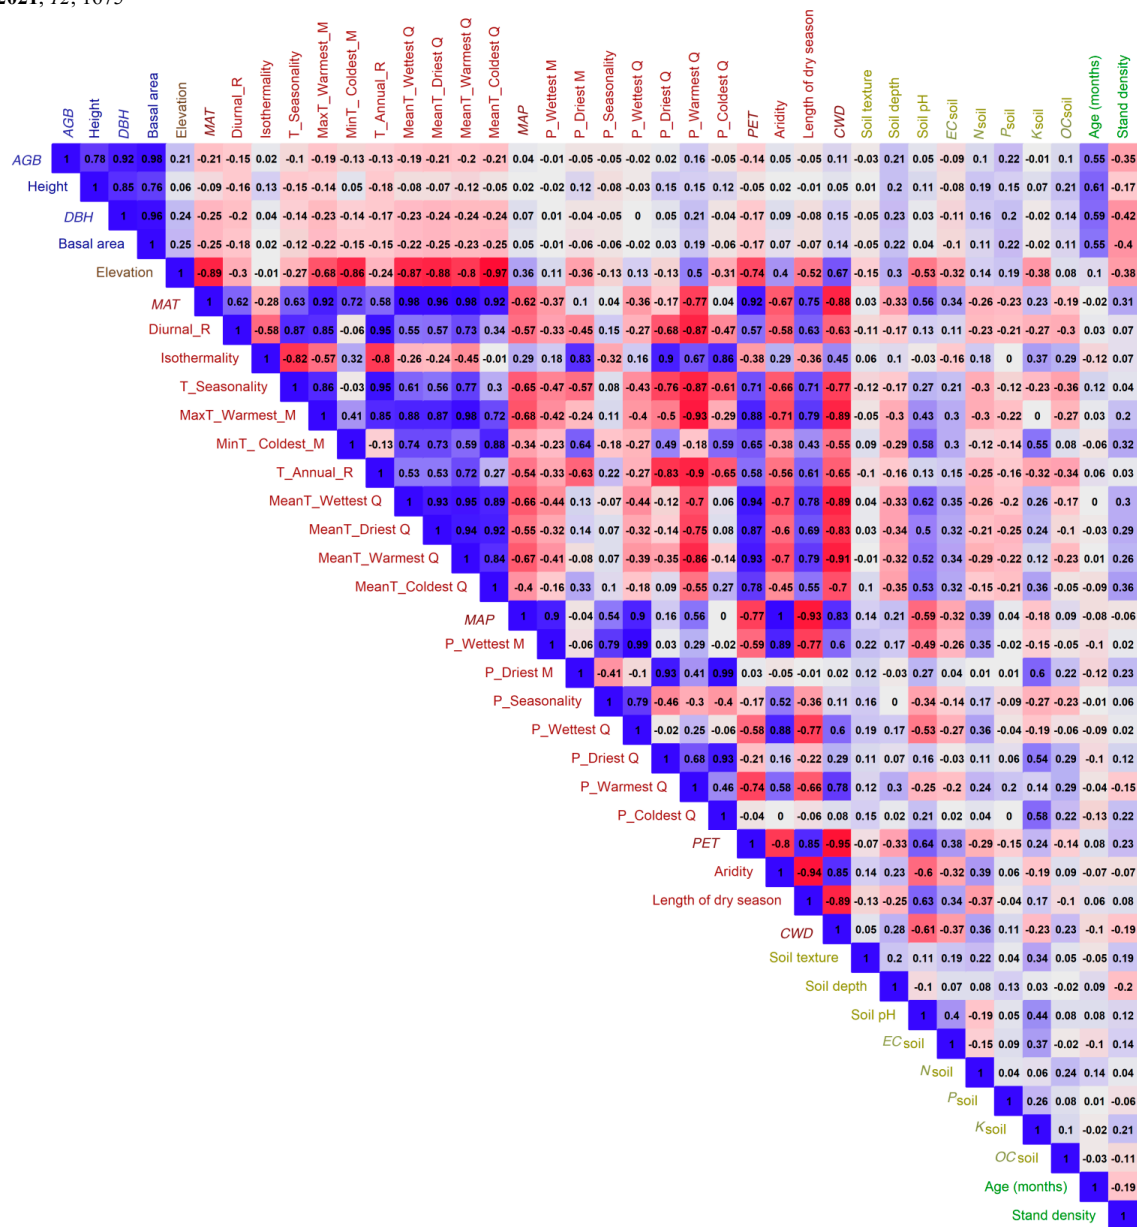

**Figure S4.** Correlation matrix of available growth, climate, soil and management variables. Units and descriptions for all variables are presented in Table S1.

**Table S1.** List of available growth, climate, soil and management variables. Given are the measurement units, means, standard deviations, standard errors, minimum and maximum values among the 186 studied woodlots.

| S# | Variables                                            | Unit                                    | Mean   | SD    | SE   | Minimum | Maximum |
|----|------------------------------------------------------|-----------------------------------------|--------|-------|------|---------|---------|
| 1  | Aboveground biomass ( <i>AGB</i> ) at plot level     | Mg ha <sup>-1</sup>                     | 29.63  | 25.28 | 1.85 | 0.29    | 110.36  |
| 2  | Mean monthly <i>AGBI</i>                             | Mg ha <sup>-1</sup> month <sup>-1</sup> | 0.73   | 0.55  | 0.04 | 0.03    | 2.75    |
| 3  | Average annual <i>AGBI</i>                           | Mg ha <sup>-1</sup> year <sup>-1</sup>  | 8.76   | 6.64  | 0.49 | 0.42    | 32.95   |
| 4  | Height                                               | m                                       | 9.46   | 3.53  | 0.26 | 1.48    | 17.58   |
| 5  | <i>DBH</i>                                           | cm                                      | 12     | 5.13  | 0.38 | 2.53    | 26.46   |
| 6  | Basal area                                           | m <sup>2</sup> ha <sup>-1</sup>         | 10.2   | 6.51  | 0.48 | 0.03    | 27.59   |
| 7  | Altitude                                             | m                                       | 675.46 | 157.9 | 11.6 | 328     | 951     |
| 8  | Age                                                  | month                                   | 39.05  | 22.06 | 1.62 | 6       | 113     |
| 9  | Age                                                  | Year                                    | 3.25   | 1.84  | 0.14 | 0.5     | 9.42    |
| 10 | Stand density                                        | Trees ha <sup>-1</sup>                  | 905.54 | 555.9 | 40.8 | 116     | 3086    |
| 11 | Irrigation <sup>a</sup>                              | Category                                | --     | --    | --   | --      | --      |
| 12 | Mean Annual Temperature ( <i>MAT</i> )               | °C                                      | 24.95  | 1.42  | 0.1  | 22.5    | 27.4    |
| 13 | Mean Diurnal Range (Mean of monthly                  | °C                                      | 10.26  | 0.87  | 0.06 | 8.8     | 11.3    |
| 14 | Isothermality (BIO2/BIO7) (* 100)                    | %                                       | 0.57   | 0.02  | 0    | 0.53    | 0.62    |
| 15 | Temperature Seasonality (standard deviation *100)    | %                                       | 187.68 | 32.51 | 2.38 | 142.2   | 247.3   |
| 16 | Max Temperature of Warmest Month                     | °C                                      | 34.57  | 2.19  | 0.16 | 31      | 37.8    |
| 17 | Min Temperature of Coldest Month                     | °C                                      | 16.56  | 1.05  | 0.08 | 14.6    | 19.4    |
| 18 | Temperature Annual Range (BIO5-BIO6)                 | °C                                      | 18.02  | 1.97  | 0.14 | 14.9    | 20.4    |
| 19 | Mean Temperature of Wettest Quarter                  | °C                                      | 24.54  | 1.24  | 0.09 | 21.7    | 27      |
| 20 | Mean Temperature of Driest Quarter                   | °C                                      | 24.65  | 1.44  | 0.11 | 21.8    | 26.7    |
| 21 | Mean Temperature of Warmest Quarter                  | °C                                      | 27.74  | 1.7   | 0.12 | 24.9    | 30.5    |
| 22 | Mean Temperature of Coldest Quarter                  | °C                                      | 22.77  | 1.06  | 0.08 | 21.1    | 24.9    |
| 23 | Mean Annual Precipitation ( <i>MAP</i> )             | mm                                      | 874.94 | 351.2 | 25.8 | 421     | 2171    |
| 24 | Precipitation of Wettest Month                       | mm                                      | 206.73 | 119   | 8.73 | 102     | 804     |
| 25 | Precipitation of Driest Month                        | mm                                      | 1.48   | 2.39  | 0.18 | 0       | 9       |
| 26 | Precipitation Seasonality (Coefficient of Variation) | %                                       | 0.9    | 0.11  | 0.01 | 0.78    | 1.42    |
| 27 | Precipitation of Wettest Quarter                     | mm                                      | 436.69 | 210.3 | 15.4 | 227     | 1537    |

|    |                                              |                     |        |       |      |       |       |
|----|----------------------------------------------|---------------------|--------|-------|------|-------|-------|
| 28 | Precipitation of Driest Quarter              | mm                  | 10.62  | 9.31  | 0.68 | 1     | 34    |
| 29 | Precipitation of Warmest Quarter             | mm                  | 151.83 | 58.18 | 4.27 | 74    | 263   |
| 30 | Precipitation of Coldest Quarter             | mm                  | 57.48  | 36.97 | 2.71 | 19    | 169   |
| 31 | Potential Evapotranspiration ( <i>PET</i> )  | mm                  | 1991.7 | 129.5 | 9.49 | 1786  | 2289  |
| 32 | Aridity Index (annual)                       | --                  | 0.45   | 0.2   | 0.01 | 0.19  | 1.19  |
| 33 | Length of dry season                         | month               | 10.26  | 1.43  | 0.1  | 7     | 12    |
| 34 | Aridity Index in dry months                  | --                  | 0.3    | 0.05  | 0    | 0.15  | 0.48  |
| 35 | Climatological water deficit ( <i>CWD</i> )  | mm yr <sup>-1</sup> | -1293  | 266.8 | 19.6 | -1844 | -824  |
| 36 | Soil depth                                   | cm                  | 74.08  | 27.27 | 2    | 30.48 | 152.4 |
| 37 | Soil texture <sup>a</sup>                    | Class               | --     | --    | --   | --    | --    |
| 38 | Soil pH                                      | --                  | --     | --    | --   | 4.32  | 8.8   |
| 39 | EC <sub>soil</sub> (electrical conductivity) | dS m <sup>-1</sup>  | 1.41   | 1.41  | 0.1  | 0.19  | 9.23  |
| 40 | N <sub>soil</sub> (nitrogen content)         | mg kg <sup>-1</sup> | 155.64 | 35.96 | 2.64 | 75.6  | 266   |
| 41 | P <sub>soil</sub> (phosphorous content)      | mg kg <sup>-1</sup> | 4      | 3.5   | 0.3  | 0.4   | 17.3  |
| 42 | K <sub>soil</sub> (potassium content)        | mg kg <sup>-1</sup> | 31.9   | 21.1  | 1.6  | 7.6   | 130.5 |
| 43 | OC <sub>soil</sub> (organic carbon content)  | % by mass           | 0.5    | 0.21  | 0.02 | -0.21 | 0.87  |

AGBI: Aboveground biomass increment; <sup>a</sup> categorical variables: irrigated vs. non-irrigated; soil texture class (sand, silt, clay).

**Table S2.** Aboveground biomass (*AGB*), average annual *AGB* increment (*AGBI*), key characteristics (age, stand density, mean annual precipitation *MAP*, soil conditions) and further information on tropical tree plantations as cited for comparison to our study. NA: no data available.

| Species            | Country                        | Age<br>(year) | Plots or<br>Replicates | Stand density<br>(trees ha <sup>-1</sup> ) | <i>AGB</i> (Mg<br>ha <sup>-1</sup> ) | <i>AGBI</i> (Mg<br>ha <sup>-1</sup> yr <sup>-1</sup> ) | <i>MAP</i> (mm yr <sup>-1</sup> ) | Soil conditions   | <i>AGB</i> estimation method | Reference     |
|--------------------|--------------------------------|---------------|------------------------|--------------------------------------------|--------------------------------------|--------------------------------------------------------|-----------------------------------|-------------------|------------------------------|---------------|
| <i>Melia dubia</i> | South India                    | 9             | 186                    | 905 ± 41<br>(Mean ± SE)                    | 93.77 <sup>A</sup>                   | 10.41 <sup>A</sup>                                     | 420-2170                          | Diverse           | Chave et al. 2014 [39]       | Present study |
|                    | India (Karnataka) <sup>#</sup> | 4             | 3                      | 2500                                       | 47.68                                | 11.22                                                  | 880                               | Black cotton soil | <i>AGB</i> estimates were    | [33]          |
|                    |                                |               | 3                      | 1666                                       | 40.58                                | 9.55                                                   |                                   |                   | derived in analogy to        |               |
|                    |                                |               | 3                      | 1250                                       | 47.89                                | 11.27                                                  |                                   |                   | our study using              |               |
|                    |                                |               | 3                      | 1000                                       | 45.83                                | 10.78                                                  |                                   |                   | <i>DBH</i> and height        |               |
|                    |                                |               | 3                      | 833                                        | 54.16                                | 12.74                                                  |                                   |                   |                              |               |
|                    |                                |               | 3                      | 714                                        | 50.98                                | 12.00                                                  |                                   |                   |                              |               |
|                    |                                |               | 3                      | 625                                        | 40.90                                | 9.62                                                   |                                   |                   |                              |               |

|                                |                       |     |    |      |        |       |                   |                                |                             |      |
|--------------------------------|-----------------------|-----|----|------|--------|-------|-------------------|--------------------------------|-----------------------------|------|
| <i>Acacia auriculiformis</i>   | India (Kerala)        | 8.8 | 3  | 1250 | 326.43 | 37.09 | 2569              | Acidic oxisols                 | Harvest-calculated          | [81] |
| <i>Acacia melanoxylon</i>      | Chile                 | 4   | 3  | 5000 | 2.60   | 0.65  | 1102              | Sandy soils                    | Harvest-measured allometric | [90] |
|                                |                       |     | 3  | 5000 | 9.60   | 2.40  | 695               | Dry, granitic soils            |                             |      |
| <i>Ailanthus triphysa</i>      | India (Kerala)        | 8.8 | 3  | 1250 | 40.54  | 4.61  | 2569              | Acidic oxisols                 | Harvest-calculated          | [81] |
| <i>Albizia procera</i>         | Puerto Rico           | 5.5 | 6  | 2500 | 124.00 | 22.55 | 1100              | Fraternidad clay               | Harvest-calculated          | [87] |
| <i>Casuarina equisetifolia</i> | India (Tamil Nadu)    | 2   | 3  | 6666 | 75.04  | 37.52 | 450-650           | Sandy clay loam                | Harvest-calculated          | [84] |
|                                | Puerto Rico           | 5.5 | 6  | 2500 | 199.00 | 36.18 | 1100              | Fraternidad Clay               | Harvest-calculated          | [87] |
|                                | India (Uttar Pradesh) | 7   | 3  | 2500 | 205.10 | 29.30 | 1000              | Silty clay loam,<br>sodic soil | Harvest-calculated          | [83] |
|                                |                       |     | 3  | 2500 | 134.70 | 19.24 |                   |                                |                             |      |
|                                |                       |     | 3  | 2500 | 176.60 | 25.23 |                   |                                |                             |      |
|                                | India (Kerala)        | 8.8 | 3  | 1250 | 95.58  | 10.86 | 2569              | Acidic oxisols                 | Harvest-calculated          | [81] |
| <i>Dalbergia sissoo</i>        | India (Karnataka)     | 3   | 24 | 2500 | 7.60   | 2.53  | 800               | Deep lateritic                 | Harvest-calculated          | [41] |
|                                | India (Uttar Pradesh) | 6   | 3  | 1967 | 16.29  | 2.71  | 977               | Sodic soil                     | Harvest-measured allometric | [82] |
|                                |                       | 9   | 3  | 1600 | 38.31  | 4.26  |                   |                                |                             |      |
|                                | India (Uttarakhand)   | 10  | 3  | 1666 | 77.90  | 7.79  | 1364              | Sandy loam                     | Harvest-calculated          | [77] |
| <i>Gmelina arborea</i>         | Nigeria               | 7   | 12 | 1736 | 85.6   | 12.2  | 1125              | NA                             | Harvest-calculated          | [88] |
|                                | India (Chhattisgarh)  | 4   | 5  | 2500 | 8.99   | 2.25  | 1250              | Black deep clay                | Harvest-calculated          | [80] |
|                                |                       |     | 5  | 1750 | 3.88   | 0.97  |                   |                                |                             |      |
|                                |                       |     | 5  | 1250 | 2.87   | 0.72  |                   |                                |                             |      |
|                                |                       |     | 5  | 1000 | 2.19   | 0.55  |                   |                                |                             |      |
|                                | India (Chhattisgarh)  | 6   | 5  | 737  | 41.12  | 6.85  | 1200              | Red lateritic soil             | Harvest-measured allometric | [79] |
|                                |                       |     | 5  | 724  | 39.30  | 6.55  |                   |                                |                             |      |
|                                |                       |     | 5  | 740  | 51.20  | 8.53  |                   |                                |                             |      |
| <i>E. camadulensis</i>         | Chile                 | 4   | 3  | 5000 | 14.90  | 3.73  | 695               | Dry, granitic soils            | Harvest-measured allometric | [90] |
| <i>E. globulus</i>             | Chile                 |     | 3  | 5000 | 22.50  | 5.63  | 1102              | Sandy soils                    |                             |      |
| <i>Eucalyptus nitens</i>       | Chile                 | 4   | 3  | 5000 | 23.40  | 5.85  | 1048              | Sandy soils                    | Harvest- allometric         | [90] |
|                                |                       |     | 3  |      | 14.60  | 3.65  | 695               | Dry, granitic soils            |                             |      |
| <i>Eucalyptus regnans</i>      | New Zealand           | 4   | 1  | 2050 | 68.5   | 17.12 | 1489 <sup>A</sup> | Sandy loam                     | Harvest-calculated          | [85] |
|                                |                       | 7   | 1  | 1850 | 198.00 | 28.29 |                   |                                |                             |      |
|                                |                       | 17  | 1  | 1250 | 460.00 | 27.06 |                   |                                |                             |      |

|                              |                       |     |          |      |        |       |                   |                                  |                             |      |
|------------------------------|-----------------------|-----|----------|------|--------|-------|-------------------|----------------------------------|-----------------------------|------|
| <i>Eucalyptus robusta</i>    | Puerto Rico           | 5.5 | 6        | 2500 | 67.00  | 12.18 | 1100              | Fraternidad Clay                 | Harvest-calculated          | [87] |
| <i>Eucalyptus saligna</i>    | New Zealand           | 8   | 1        | 829  | 129.8  | 16.22 | 1662 <sup>B</sup> | OropiKaharoa                     | Harvest-calculated          | [86] |
| <i>E. tereticornis</i>       | India (Uttarakhand)   | 10  | NA       | 992  | 126.1  | 12.61 | 1727              | Alluvial and clay                | NA                          | [20] |
|                              | India (Haryana)       | 10  | 1        | 6530 | 122.5  | 12.25 | 766               | Silt-loam on improved sodic land | Harvest-calculated          | [44] |
|                              |                       |     | 1        | 1993 | 261.5  | 26.15 |                   |                                  |                             |      |
|                              |                       |     | 1        | 517  | 177.5  | 17.75 |                   |                                  |                             |      |
|                              |                       |     | 1        | 163  | 54.6   | 5.46  |                   |                                  |                             |      |
| (Boundary plantation)        | India (Uttarakhand)   | 10  |          | 120  | 21.22  | 2.12  | 1364              | Sandy loam                       | Harvest-calculated          | [77] |
| <i>Leucaena leucocephala</i> | Puerto Rico           | 5.5 | 6        | 2500 | 47.00  | 8.55  | 1100              | Fraternidad Clay                 | Harvest-calculated          | [87] |
| (var. K8)                    |                       |     |          |      |        |       |                   |                                  |                             |      |
| var.P.R                      |                       | 5.5 | 6        | 2500 | 33.00  | 6.00  | 1100              |                                  |                             |      |
|                              | India (Kerala)        | 8.8 | 3        | 1250 | 22.81  | 2.59  | 2569              | Acidic oxisols                   | Harvest-calculated          | [81] |
| <i>Populus deltoides</i>     | India (Uttarakhand)   | 1   | 3        | 500  | 1.26   | 1.26  | 1364              | Sandy clay loam                  | Harvest-calculated          | [78] |
|                              |                       | 5   | 3        | 500  | 52.95  | 10.59 |                   |                                  |                             |      |
|                              |                       | 11  | 3        | 500  | 180.24 | 16.39 |                   |                                  |                             |      |
|                              | India (Uttarakhand)   | 8   | 3        | 500  | 50.10  | 6.26  | 1364              | Sandy loam                       | Harvest-calculated          | [75] |
| <i>Pterocarpus marsupium</i> | India (Kerala)        | 8.8 | 3        | 1250 | 66.11  | 7.51  | 2569              | Acidic oxisols                   | Harvest-calculated          | [81] |
| <i>Tectona grandis</i>       | India (Uttar Pradesh) | 4   | 10 trees | 3490 | 25.40  | 6.35  | 900               | Sandy loam                       | Harvest-calculated          | [75] |
|                              |                       | 14  | 14 trees | 1040 | 39.92  | 2.85  | 900               |                                  |                             |      |
|                              |                       | 30  | 10 trees | 474  | 76.95  | 2.57  | 900               |                                  |                             |      |
|                              | India (Tamil Nadu)    | 20  | NA       | NA   | 320.00 | 16.00 | 1100              | NA                               | Harvest-measured allometric | [76] |
|                              |                       | 47  | NA       | NA   | 410.00 | 8.72  | 1100              | NA                               |                             |      |

# Mean tree diameter and height were used with a wood density of  $0.35 \text{ g cm}^{-3}$ ; <sup>A</sup> model-estimated average *AGB* for nine year old *M. dubia* plantations as presented in our study; <sup>B</sup> precipitation (mm) was extracted from WorldClim database (Version 2, <http://worldclim.org>).
